# Supplementary material for: Hydrogen Peroxide Promotes Aβ Production through JNK-dependent Activation of γ-Secretase
Source: PubMed Central journal article supplement — J Biol Chem. 2008 Jun 20;283(25):17721–30. doi: 10.1074/jbc.M800013200 (PMC2427353; doi:10.1074/jbc.m800013200), 2008-06-20

## HYDROGEN PEROXIDE PROMOTES A $\beta$ PRODUCTION THROUGH JNK-DEPENDENT ACTIVATION OF $\gamma$ -SECRETASE

Chengyong Shen<sup>1</sup>, Yongfeng Chen<sup>1</sup>, Huaqing Liu<sup>1</sup>, Kejing Zhang<sup>1</sup>,  
Ting Zhang<sup>1</sup>, Anning Lin<sup>2</sup>, Naihe Jing<sup>1,\*</sup>

### SUPPLEMENTAL DATA

#### SUPPLEMENTARY MATERIALS AND METHODS

*Plasmids* - Expression vectors encoding GST-c-Jun-(1-79), HA-JNKK2-JNK1, HA-JNKK2(KM)-JNK1 have been described previously (1,2). To construct GST-PS1 bacterial expression vectors, PS1 cDNA was amplified by PCR from the pcDNA3.1-PS1 plasmid (3). The PCR product was digested with BamHI and EcoRI enzymes, and cloned into pGEX-4T-1 vectors (Amersham Pharmacia).

*Subcellular Fractionation* - SH-SY5Y/APP695myc cells were harvested and homogenized in cell lysis buffer containing 50 mM Tris-HCl (pH 7.4), 150 mM NaCl, 1 mM EDTA, 0.25 mM PMSF and cocktails of protease inhibitors. The homogenate was centrifuged for 10 min at 1,000 $\times$ g at 4 $^{\circ}$ C to prepare a post-nuclear supernatant fraction. Membranes were pelleted from the PNS by centrifugation for 30 min at 13,000 $\times$ g. The resulting supernatant was designated as cell cytoplasm. All fractions were subjected to Western blot.

*Purification of Recombinant Proteins* - GST-PS1 and GST-c-Jun-(1-79) proteins were purified using glutathione-agarose according to the manufacturer's procedure (Amersham Pharmacia).

*Protein Kinase Assay* - HEK293T cells were transfected with expression vectors encoding HA-JNKK2-JNK1, HA-JNKK2(KM)-JNK1 (1  $\mu$ g each) for 24 h as indicated. Cells were lysed and HA-JNKK2-JNK1 proteins were immunoprecipitated by anti-HA antibody (1:1,000, Sigma). The activity of the JNK immunocomplex was measured by kinase assays with GST-c-Jun-(1-79) and GST-PS1 as substrates. The reaction was incubated at 30 $^{\circ}$ C for 1 h in 30  $\mu$ l of kinase buffer in the presence of 10  $\mu$ M ATP/10  $\mu$ Ci [ $\gamma$ -<sup>32</sup>P]ATP (10 Ci/mmol). The reactions were terminated with 4 $\times$  Laemmli sample buffers. The proteins were resolved by 13% SDS-PAGE, followed by autoradiography.

#### SUPPLEMENTARY FIGURE LEGENDS

**FIGURE S1. The characteristics of APP processing products.** A. HEK293T cells were transiently transfected with expression vectors encoding AICD57myc (lane 2), AICD59myc (lane 3), SP-C99myc (lane 4) as positive controls to recognize the bands. pcDNA3.1 vectors were transfected as negative controls (lanes 1 and 6). SH-SY5Y/APP695myc cells were subjected to subcellular fractionation followed by Western blot (lanes 7, 8 and 9). APP695myc and C83myc in cytoplasm was a result of membrane contamination from incomplete subcellular fractionation separation. B. HEK293T cells were transiently transfected with expression vectors encoding SP-C99myc (lane 2) and APP695myc (lanes 3, 4, 5 and 6). After 24 h, cells were pretreated with 10  $\mu$ M DAPT (lanes 5 and 6) or DMSO (lanes 3 and 4) for 3 h, and treated with 1 mM H<sub>2</sub>O<sub>2</sub> for another hour. Cells were harvested and analyzed by immunoblotting with APP c-terminal antibody (anti-APP676-695, 1:4,000, Sigma). C. HEK293T cells were transiently transfected with expression vectors encoding APP695 (lanes 2 and 3). After 24 h, cells were treated with 1 mM H<sub>2</sub>O<sub>2</sub> (lane 3) and analyzed by immunoblotting with anti-APP676-695.

**FIGURE S2. Activated-JNK directly phosphorylates GST-PS1 *in vitro*.** HEK293T cells were transfected with expression vectors encoding HA-JNKK2-JNK1, HA-JNKK2(KM)-JNK1. Cells were

lysed and the JNK activity of the immunocomplex was measured by kinase assays with GST-c-Jun-(1-79) and GST-PS1 as substrates. An aliquot of each sample was analyzed for the expression of HA-JNKK2-JNK1 and HA-JNKK2(KM)-JNK1 by immunoblotting using anti-HA antibody (1:10,000). KA, kinase assay. IB, immunoblotting. IP, immunoprecipitation. CS, Coomassie blue staining.

**FIGURE S3. Effects of cell signal inhibitors on H<sub>2</sub>O<sub>2</sub>-triggered cell death.** SH-SY5Y/APP695myc cells were serum-starved for 12 h and pretreated with U0126 (5 μM) (c and d), Wortmannin (20 nM) (e and f), SP600125 (20 μM) (g and h) or the control DMSO (a and b) for 3 h. With exposure to 1 mM H<sub>2</sub>O<sub>2</sub> for 1 h, morphological images of cells were taken with Olympus BX50 microscopy to determine the effects of cell signal inhibitors on H<sub>2</sub>O<sub>2</sub>-triggered cell death.

## REFERENCES

1. Lin, A., Minden, A., Martinetto, H., Claret, F. X., Lange-Carter, C., Mercurio, F., Johnson, G. L., and Karin, M. (1995) *Science* **268**(5208), 286-290
2. Zheng, C., Xiang, J., Hunter, T., and Lin, A. (1999) *J Biol Chem* **274**(41), 28966-28971
3. Steiner, H., Romig, H., Grim, M. G., Philipp, U., Pesold, B., Citron, M., Baumeister, R., and Haass, C. (1999) *J Biol Chem* **274**(12), 7615-7618



**FIGURE S2**

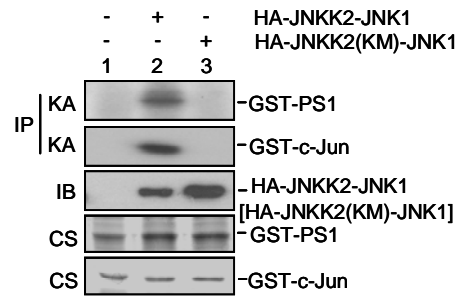

**FIGURE S3**

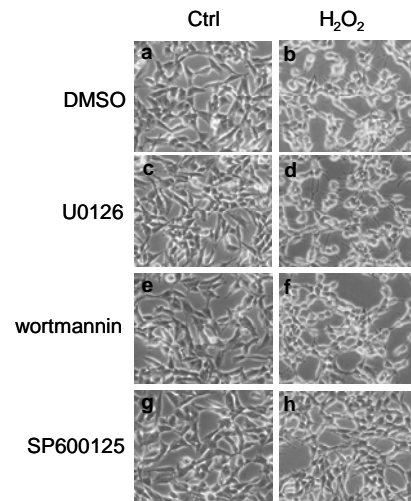

Supplement: M800013200_1.pdf [file M800013200_1.pdf]
